# Supplementary material for: Biodegradable chitosan/alginate BSA-gel-capsules for pH-controlled loading and release of doxorubicin and treatment of pulmonary melanoma
Source: Royal Society of Chemistry journal article supplement (doi:10.1039/c3tb20330a), 2013-01-01
Supplement: c3tb20330a.pdf [file c3tb20330a.pdf]

### Supplementary Information 1: The energy-dispersive X-ray analysis

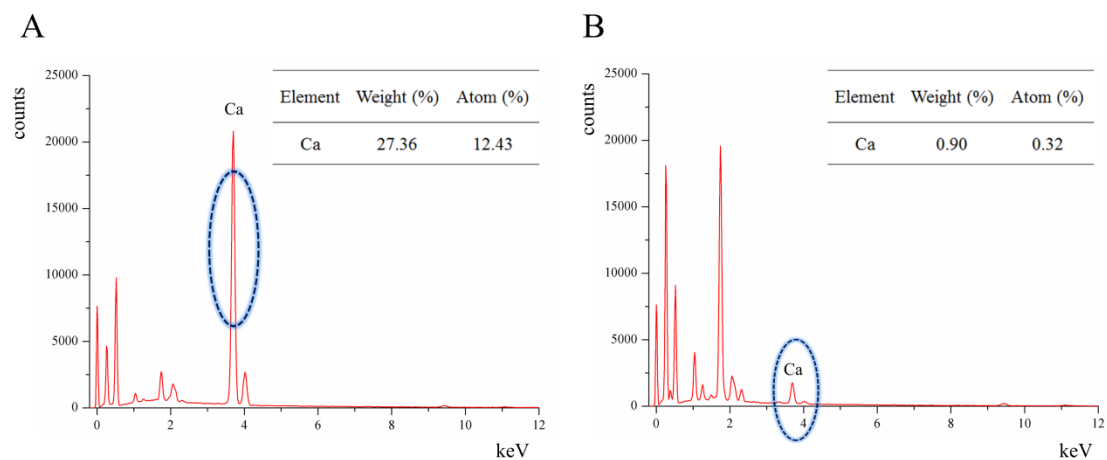

**Fig. S1.** The energy-dispersive X-ray analysis of (A)  $\text{CaCO}_3$ (BSA) particles and (B) BSA-gel-capsules(MPs). There was little calcium in BSA-gel-capsules(MPs), indicating that  $\text{CaCO}_3$  was almost completely removed after treatment with EDTA.
